# Supplementary material
Source: MDPI journal article supplement (https://www.mdpi.com/2075-163X/13/1/18)
Supplement: s1 [file s1]

Appendix Table S1. Electron microprobe analysis (%) of garnet from the Niukutou deposit

| Sample   | Generation | SiO <sub>2</sub> | TiO <sub>2</sub> | Al <sub>2</sub> O <sub>3</sub> | C <sub>2</sub> O <sub>3</sub> | FeO   | MnO  | MgO  | CaO   | Total | And   | Gro   | Pyr   |
|----------|------------|------------------|------------------|--------------------------------|-------------------------------|-------|------|------|-------|-------|-------|-------|-------|
| KUB213.1 | Grt1       | 36.90            | 0.00             | 0.20                           | 0.02                          | 27.48 | 0.24 | 0.11 | 32.18 | 97.14 | 99.39 | 0.00  | 0.61  |
| KUB213.2 | Grt1       | 35.55            | 0.09             | 0.27                           | 0.01                          | 27.02 | 0.28 | 0.11 | 31.97 | 95.30 | 97.86 | 0.99  | 1.15  |
| KUB213.3 | Grt1       | 35.82            | 0.00             | 3.19                           | 0.00                          | 23.95 | 0.42 | 0.10 | 32.68 | 96.15 | 84.15 | 14.24 | 1.61  |
| KUB213.4 | Grt1       | 37.70            | 0.07             | 11.32                          | 0.00                          | 14.04 | 0.75 | 0.00 | 32.65 | 96.53 | 45.08 | 50.98 | 3.94  |
| KUB213.5 | Grt1       | 38.92            | 0.00             | 11.29                          | 0.01                          | 13.83 | 0.76 | 0.04 | 33.95 | 98.80 | 46.28 | 51.55 | 2.17  |
| KUB214.1 | Grt1       | 36.76            | 0.14             | 0.68                           | 0.03                          | 26.91 | 0.60 | 0.12 | 32.01 | 97.27 | 96.55 | 1.46  | 1.99  |
| KUB214.2 | Grt1       | 35.73            | 0.11             | 0.01                           | 0.03                          | 27.88 | 0.37 | 0.06 | 32.26 | 96.45 | 99.04 | 0.00  | 1.22  |
| KUB214.3 | Grt1       | 35.61            | 0.01             | 0.00                           | 0.00                          | 27.49 | 0.39 | 0.07 | 32.69 | 96.26 | 97.23 | 1.52  | 1.25  |
| KUB214.4 | Grt1       | 36.19            | 0.00             | 0.02                           | 0.05                          | 28.23 | 0.40 | 0.07 | 32.06 | 97.01 | 97.94 | 0.00  | 2.06  |
| KUB214.5 | Grt1       | 36.12            | 0.00             | 0.01                           | 0.02                          | 28.18 | 0.50 | 0.11 | 31.79 | 96.74 | 97.44 | 0.00  | 2.56  |
| KUB214.6 | Grt1       | 38.06            | 0.04             | 10.73                          | 0.00                          | 14.83 | 0.73 | 0.03 | 33.85 | 98.27 | 49.00 | 48.53 | 2.48  |
| KUB214.7 | Grt1       | 38.05            | 0.02             | 11.12                          | 0.04                          | 14.51 | 0.67 | 0.03 | 33.28 | 97.73 | 46.70 | 49.88 | 3.41  |
| NZB271-1 | Grt2       | 35.09            | 0.00             | 1.68                           | 0.03                          | 26.13 | 0.70 | 0.16 | 33.99 | 97.79 | 88.06 | 2.25  | 9.69  |
| NZB271-2 | Grt2       | 35.50            | 0.00             | 0.04                           |                               | 28.28 | 0.67 | 0.14 | 33.32 | 97.94 | 97.27 | 2.12  | 0.61  |
| NZB271-3 | Grt2       | 35.27            | 0.00             | 0.02                           | 0.04                          | 28.09 | 0.78 | 0.17 | 33.52 | 97.87 | 95.80 | 2.47  | 1.72  |
| NZB271-4 | Grt2       | 35.34            | 0.00             | 0.49                           |                               | 27.49 | 0.75 | 0.12 | 33.73 | 97.92 | 93.31 | 2.23  | 4.46  |
| NZB271-5 | Grt2       | 35.42            | 0.00             | 0.10                           |                               | 28.49 | 0.74 | 0.09 | 33.44 | 98.27 | 97.67 | 2.09  | 0.24  |
| NZB269.1 | Grt2       | 37.88            | 0.00             | 11.45                          | 0.00                          | 13.64 | 1.16 | 0.07 | 32.40 | 96.59 | 44.43 | 50.89 | 4.68  |
| NZB269.2 | Grt2       | 36.36            | 0.00             | 14.72                          | 0.01                          | 3.86  | 0.18 | 2.88 | 36.19 | 94.20 | 11.21 | 78.51 | 10.28 |
| NZB273.1 | Grt2       | 40.49            | 0.00             | 20.33                          |                               | 2.62  | 0.00 | 0.12 | 35.93 | 99.49 | 7.60  | 91.36 | 1.04  |
| NZB273.2 | Grt2       | 35.00            | 0.00             | 0.18                           | 0.01                          | 27.64 | 0.24 | 0.08 | 33.98 | 97.14 | 94.43 | 4.67  | 0.90  |
| NZB124   | Grt2       | 36.10            | 0.00             | 8.57                           | 0.07                          | 17.03 | 0.43 | 0.07 | 33.47 | 95.74 | 58.33 | 40.10 | 1.57  |
| NZB086.1 | Grt2       | 35.85            | 0.00             | 0.04                           | 0.03                          | 27.61 | 1.41 | 0.14 | 33.39 | 98.47 | 93.27 | 3.77  | 2.95  |
| NZB086.2 | Grt2       | 35.51            | 0.00             | 0.11                           | 0.02                          | 27.71 | 1.43 | 0.12 | 32.43 | 97.32 | 96.63 | 3.37  | 0.00  |

|          |      |       |      |       |      |       |      |      |       |       |       |       |      |
|----------|------|-------|------|-------|------|-------|------|------|-------|-------|-------|-------|------|
| KUK002.1 | Grt2 | 37.00 | 0.00 | 3.15  | 0.00 | 24.24 | 0.43 | 0.04 | 32.75 | 97.61 | 84.39 | 13.88 | 1.73 |
| KUK002.2 | Grt2 | 37.30 | 0.06 | 2.29  | 0.04 | 25.07 | 0.59 | 0.08 | 32.60 | 98.03 | 88.58 | 9.69  | 1.73 |
| KUK002.3 | Grt2 | 37.49 | 0.00 | 2.30  | 0.00 | 23.94 | 0.39 | 0.04 | 32.98 | 97.13 | 84.08 | 14.85 | 1.07 |
| KUK002.4 | Grt2 | 37.32 | 0.04 | 4.82  | 0.00 | 21.77 | 0.55 | 0.00 | 32.81 | 97.31 | 76.12 | 22.34 | 1.54 |
| KUK002.5 | Grt2 | 36.87 | 0.00 | 0.35  | 0.00 | 27.23 | 0.34 | 0.06 | 32.92 | 97.77 | 95.85 | 3.10  | 1.05 |
| KUK002.6 | Grt2 | 37.31 | 0.00 | 0.82  | 0.04 | 26.66 | 0.55 | 0.12 | 32.20 | 97.71 | 95.30 | 2.86  | 1.83 |
| NKB67B.1 | Grt2 | 36.08 | 0.00 | 0.50  | 0.02 | 27.94 | 0.44 | 0.05 | 33.67 | 98.69 | 96.00 | 2.75  | 1.25 |
| NKB67B.2 | Grt2 | 35.70 | 0.00 | 0.43  | 0.01 | 27.94 | 0.41 | 0.06 | 33.51 | 98.05 | 96.51 | 2.32  | 1.17 |
| NKB67B.3 | Grt2 | 37.86 | 0.00 | 12.02 | 0.01 | 13.10 | 1.07 | 0.01 | 35.29 | 99.36 | 42.44 | 55.20 | 2.36 |
| NKB67B.4 | Grt2 | 35.65 | 0.00 | 0.13  | 0.00 | 27.80 | 0.45 | 0.07 | 33.90 | 98.00 | 94.71 | 3.96  | 1.33 |
| NKB67B.5 | Grt2 | 35.74 | 0.00 | 0.77  | 0.07 | 26.94 | 0.43 | 0.13 | 33.72 | 97.79 | 92.33 | 6.15  | 1.51 |

---

Appendix Table S2. Electron microprobe analysis (%) of pyroxene from the Niukutou deposit

| Sample     | Generation | SiO <sub>2</sub> | TiO <sub>2</sub> | Al <sub>2</sub> O <sub>3</sub> | Cr <sub>2</sub> O <sub>3</sub> | FeO   | MnO   | MgO   | CaO   | Total  | Jo    | Di    | Hd    |
|------------|------------|------------------|------------------|--------------------------------|--------------------------------|-------|-------|-------|-------|--------|-------|-------|-------|
| NKB080     | Px1        | 49.57            | 0.04             | 0.32                           | 0.04                           | 24.16 | 2.91  | 0.89  | 22.03 | 99.96  | 10.22 | 5.50  | 84.28 |
| NKB022     | Px1        | 48.32            |                  | 0.17                           |                                | 25.50 | 2.41  | 2.41  | 22.10 | 100.92 | 7.64  | 13.44 | 78.93 |
| NKB19      | Px1        | 49.74            |                  | 0.09                           | 0.12                           | 23.15 | 3.34  | 3.34  | 21.66 | 101.43 | 10.42 | 18.34 | 71.24 |
| NKB17      | Px1        | 48.99            |                  | 0.41                           | 0.03                           | 24.61 | 2.74  | 2.74  | 22.01 | 101.53 | 8.64  | 15.21 | 76.15 |
| NKB57      | Px1        | 49.61            |                  | 0.24                           | 0.02                           | 23.40 | 4.44  | 4.44  | 21.67 | 103.81 | 12.65 | 22.27 | 65.08 |
| NZB274     | Px1        | 49.46            |                  | 0.18                           | 0.03                           | 25.46 | 1.80  | 0.83  | 22.15 | 99.92  | 6.31  | 5.11  | 88.58 |
| KUK003     | Px1        | 52.75            | 0.07             | 0.00                           | 0.00                           | 10.09 | 0.99  | 11.53 | 23.93 | 99.35  | 3.16  | 64.93 | 31.91 |
| KUB241     | Px1        | 48.11            | 0.01             | 0.51                           | 0.00                           | 23.30 | 4.13  | 0.62  | 21.24 | 97.92  | 14.59 | 3.86  | 81.56 |
| NZB272     | Px1        | 48.80            |                  | 0.75                           | 0.04                           | 24.30 | 3.10  | 3.75  | 18.70 | 99.44  | 9.20  | 19.60 | 71.20 |
| KUB211-1-1 | Px1        | 49.10            | 0.02             | 0.23                           | 0.00                           | 22.53 | 3.26  | 1.31  | 22.08 | 98.53  | 11.67 | 8.23  | 80.10 |
| KUB211-2-1 | Px1        | 50.51            | 0.00             | 0.08                           | 0.00                           | 23.00 | 3.03  | 1.31  | 22.44 | 100.38 | 10.74 | 8.17  | 81.10 |
| KUK009-1-1 | Px2        | 49.98            | 0.00             | 0.19                           | 0.03                           | 21.90 | 6.45  | 0.48  | 21.49 | 100.53 | 22.17 | 2.90  | 74.93 |
| KUK009-2-1 | Px2        | 49.64            | 0.04             | 0.21                           | 0.00                           | 21.40 | 6.99  | 0.84  | 21.53 | 100.66 | 23.54 | 5.00  | 71.47 |
| NKB-24     | Px2        | 49.77            |                  | 0.01                           | 0.01                           | 14.29 | 14.33 | 0.06  | 21.27 | 99.73  | 23.79 | 41.87 | 34.35 |
| KUB-24     | Px2        | 48.64            | 0.07             | 0.09                           | 0.04                           | 20.32 | 6.92  | 1.53  | 21.61 | 99.21  | 23.31 | 9.07  | 67.62 |
| NKB025     | Px2        | 50.09            |                  | 0.25                           |                                | 16.40 | 9.24  | 9.24  | 21.56 | 106.79 | 22.38 | 39.39 | 38.22 |
| NZB-144    | Px2        | 49.00            |                  | 0.61                           |                                | 18.07 | 9.32  | 1.13  | 20.79 | 98.92  | 31.85 | 6.77  | 61.38 |
| NZB-128.1  | Px3        | 48.32            | 0.00             | 0.36                           | 0.06                           | 11.52 | 18.06 | 0.68  | 18.29 | 97.29  | 58.77 | 3.92  | 37.32 |
| NZB-128.2  | Px3        | 49.13            |                  | 0.32                           | 0.03                           | 12.02 | 16.47 | 0.39  | 21.16 | 99.52  | 56.61 | 2.35  | 41.04 |
| NZB-128.3  | Px3        | 48.64            | 0.01             | 0.09                           | 0.10                           | 14.90 | 13.72 | 0.61  | 21.02 | 99.09  | 46.43 | 3.63  | 49.95 |
| NZB-131    | Px3        | 49.08            | 0.03             | 0.61                           | 0.03                           | 9.28  | 19.44 | 0.71  | 20.25 | 99.42  | 64.98 | 4.19  | 30.82 |
| NZB-132    | Px3        | 49.24            |                  | 0.20                           |                                | 15.75 | 12.60 | 0.72  | 21.32 | 99.82  | 42.72 | 4.29  | 52.99 |

Appendix Table S3. Electron microprobe analysis (%) of ilvaite from the Niukutou deposit

| Sample    | Generation | SiO <sub>2</sub> | TiO <sub>2</sub> | Al <sub>2</sub> O <sub>3</sub> | FeO   | MnO   | MgO  | CaO   | Total | Mn-ilv% | Fe <sup>3+</sup> | Fe <sup>2+</sup> | Fe <sub>2</sub> O <sub>3</sub> |
|-----------|------------|------------------|------------------|--------------------------------|-------|-------|------|-------|-------|---------|------------------|------------------|--------------------------------|
| KUB226.1  | 1          | 30.84            | 0.00             | 0.46                           | 46.88 | 3.61  | 0.20 | 13.24 | 95.23 | 10.87   | 0.78             | 1.85             | 13.94                          |
| KUB226.2  | 1          | 29.53            | 0.00             | 0.76                           | 46.74 | 3.40  | 0.25 | 12.73 | 93.41 | 11.04   | 0.88             | 1.81             | 15.27                          |
| KUB226.3  | 1          | 30.84            | 0.00             | 0.46                           | 46.88 | 3.61  | 0.20 | 13.24 | 95.23 | 10.87   | 0.78             | 1.85             | 13.94                          |
| KUB214.8  | 1          | 30.75            | 0.04             | 0.42                           | 47.54 | 3.63  | 0.02 | 13.68 | 96.07 | 10.07   | 0.80             | 1.85             | 14.40                          |
| KUB214.9  | 1          | 30.23            | 0.17             | 0.37                           | 48.94 | 1.78  | 0.13 | 14.01 | 95.62 | 5.63    | 0.83             | 1.92             | 14.76                          |
| KUB214.10 | 1          | 30.28            | -                | 0.15                           | 48.45 | 3.76  | 0.21 | 13.73 | 96.58 | 11.57   | 0.91             | 1.79             | 16.36                          |
| NKB051b   | 2          | 30.44            |                  | 1.03                           | 45.39 | 5.70  | 0.10 | 13.59 | 96.24 | 16.32   | 0.83             | 1.70             | 14.86                          |
| NKB092    | 2          | 30.23            |                  | 0.06                           | 46.45 | 5.77  | 0.08 | 13.65 | 96.24 | 16.56   | 0.91             | 1.70             | 16.22                          |
| NZB004.1  | 2          | 30.50            | 0.07             | 0.26                           | 45.77 | 5.57  | 0.34 | 13.72 | 96.23 | 17.14   | 0.86             | 1.69             | 15.48                          |
| NZB004.2  | 2          | 30.12            | 0.01             | 0.18                           | 46.64 | 4.65  | 0.39 | 13.68 | 95.67 | 14.99   | 0.90             | 1.73             | 15.95                          |
| KUB239    | 2          | 29.45            | 0.06             | 0.51                           | 46.23 | 4.82  | 0.33 | 13.24 | 94.64 | 15.51   | 0.93             | 1.70             | 16.41                          |
| NZB133    | 3          | 30.05            | 0.08             | 0.83                           | 44.92 | 7.20  | 0.16 | 13.55 | 96.79 | 21.06   | 0.92             | 1.58             | 16.49                          |
| KUB217    | 3          | 30.19            | 0.12             | 0.06                           | 41.82 | 9.95  | 0.15 | 13.07 | 95.36 | 28.63   | 0.90             | 1.46             | 15.99                          |
| NZB-135   | 3          | 29.95            |                  | 1.28                           | 38.58 | 13.27 | 0.28 | 12.97 | 96.32 | 38.89   | 0.93             | 1.22             | 16.64                          |

Appendix Table S4. Electron microprobe analysis (%) of epidote and chlorite from the Niukutou deposit

| Sample  | minerals | SiO <sub>2</sub> | TiO <sub>2</sub> | Al <sub>2</sub> O <sub>3</sub> | FeO   | MnO   | MgO  | CaO   | Total |
|---------|----------|------------------|------------------|--------------------------------|-------|-------|------|-------|-------|
| NZB144  | epidote  | 37.801           |                  | 24.64                          | 9.16  | 0.78  | 0.02 | 23.40 | 95.81 |
| NDS2    | epidote  | 38.669           |                  | 25.12                          | 9.32  | 0.06  |      | 23.00 | 96.15 |
| NKB065  | epidote  | 38.622           |                  | 22.64                          | 11.96 | 0.03  |      | 22.89 | 96.14 |
| NZB259  | epidote  | 38.618           |                  | 23.62                          | 10.88 | 0.05  | 0.02 | 22.84 | 96.03 |
| JYB5    | epidote  | 38.909           |                  | 26.22                          | 7.83  | 0.03  | 0.01 | 23.04 | 96.02 |
| JYB6    | epidote  | 39.056           |                  | 24.59                          | 10.13 | 0.04  | 0.03 | 23.01 | 96.86 |
| JYB12-1 | epidote  | 38.047           | 0.013            | 23.54                          | 12.57 | 0.14  | 0.03 | 23.76 | 98.10 |
| NZB84.1 | chlorite | 25.53            |                  | 18.78                          | 0.12  | 32.50 | 2.10 | 8.33  | 0.01  |
| NZB84.2 | chlorite | 26.32            |                  | 18.65                          | 0.10  | 32.00 | 2.12 | 8.97  | 0.04  |

Appendix Table S5. The LA-ICP-MS in-situ microanalysis results of garnet, pyroxene and ilvaite in the Niukutou deposit

| Sample    | Type | Sc   | V      | Cr     | Co    | Zn     | Cu   | Rb   | Sr     | Cs   | Ba   | La    | Ce    | Pr   | Nd    | Sm   | Eu    |
|-----------|------|------|--------|--------|-------|--------|------|------|--------|------|------|-------|-------|------|-------|------|-------|
| KUB213.1  | Grt1 | 1.09 | -      | 4.71   | 0.34  | 4.25   | -    | -    | 0.16   | 0.01 | 0.18 | 0.44  | 1.36  | 0.13 | 0.29  | -    | 0.93  |
| KUB213.2  | Grt1 | 0.93 | -      | 2.34   | 0.43  | 2.37   | 0.22 | 0.05 | 0.09   | -    | -    | 1.31  | 6.39  | 0.83 | 4.05  | 0.32 | 0.87  |
| KUB213.3  | Grt1 | 1.03 | 0.09   | 3.65   | 0.35  | 4.06   | -    | -    | -      | 0.09 | 0.30 | 1.05  | 5.22  | 0.64 | 1.93  | 0.33 | 0.53  |
| KUB213.4  | Grt1 | 0.91 | -      | 3.88   | 0.28  | 2.56   | 4.29 | -    | -      | 0.02 | 0.38 | 1.11  | 5.68  | 0.72 | 2.12  | 0.34 | 0.85  |
| KUB213.5  | Grt1 | 0.71 | -      | 1.62   | 0.34  | 4.64   | 0.21 | -    | 0.08   | 0.12 | -    | 1.66  | 7.04  | 0.89 | 3.87  | 0.31 | 0.62  |
| KUB214.1  | Grt1 | 8.47 | 155.58 | 45.81  | 0.43  | 19.47  | -    | 1.48 | 253.90 | 1.19 | 2.58 | 20.20 | 37.32 | 4.60 | 17.65 | 4.12 | 33.62 |
| KUB214.2  | Grt1 | 5.85 | 117.44 | 50.12  | 0.11  | 6.57   | 0.01 | 2.20 | 144.55 | 0.14 | 8.61 | 18.19 | 34.36 | 4.08 | 12.91 | 3.84 | 11.76 |
| KUB214.3  | Grt1 | 0.94 | 17.30  | 11.51  | 0.08  | 49.55  | -    | 0.17 | 0.95   | 0.35 | -    | 4.56  | 13.31 | 1.57 | 5.90  | 0.43 | 0.79  |
| KUB214.4  | Grt1 | 4.10 | 76.92  | 47.30  | 0.38  | 39.35  | -    | 0.72 | 1.81   | 2.17 | -    | 0.51  | 2.01  | 0.41 | 2.88  | 0.91 | 0.58  |
| NKB67B.1  | Grt2 | 3.55 | 18.36  | 13.59  | 0.21  | 1.55   | -    | 0.20 | 0.09   | 0.17 | 0.17 | 2.40  | 6.07  | 0.62 | 2.23  | 0.41 | 0.33  |
| NKB67B.2  | Grt2 | 2.60 | 72.44  | 31.89  | 0.17  | 7.41   | -    | 0.58 | 0.29   | 0.93 | 1.16 | 2.54  | 9.18  | 1.72 | 8.76  | 2.44 | 0.87  |
| NKB67B.3  | Grt2 | 0.80 | 0.98   | 3.07   | -     | 1.42   | 0.14 | -    | 0.19   | 0.02 | -    | 0.23  | 0.48  | 0.21 | 1.77  | 0.97 | 0.48  |
| NKB67B.4  | Grt2 | 0.76 | 0.50   | 4.83   | 0.21  | 2.15   | -    | -    | 0.02   | -    | -    | 0.15  | 0.43  | 0.22 | 1.86  | 1.62 | 0.70  |
| NZB272.1  | Px1  | 1.75 | 1.85   | 24.64  | 0.36  | 97.40  | 2.04 | 0.03 | 3.77   | 0.17 | 0.86 | 0.12  | 0.12  | 0.04 | 0.24  | 0.22 | 0.06  |
| NZB272.2  | Px1  | 1.51 | 4.21   | 26.07  | 0.23  | 127.62 | 0.57 | 0.05 | 4.96   | 0.28 | 1.32 | 0.74  | 0.62  | 0.16 | 0.55  | 0.13 | 0.14  |
| KUB241    | Px1  | 5.85 | 14.50  | 89.18  | 4.03  | 206.87 | 0.13 | 1.38 | 2.87   | 0.32 | 0.90 | 0.12  | 0.28  | 0.03 | 0.17  | 0.04 | -     |
| KUK003    | Px1  | 1.91 | 5.35   | 9.29   | 3.49  | 181.12 | -    | 0.46 | 1.82   | 0.05 | 0.42 | 0.07  | 0.06  | 0.02 | 0.03  | -    | -     |
| NKB24     | Px2  | 4.29 | 270.42 | 19.18  | 9.72  | 198.49 | 1.55 | 1.13 | 23.45  | 2.66 | 0.87 | 0.60  | 1.14  | 0.19 | 0.76  | 0.23 | 0.19  |
| KUB24     | Px2  | 5.37 | 249.57 | 27.39  | 10.46 | 87.03  | 0.63 | 0.66 | 20.76  | 1.40 | 0.79 | 0.65  | 0.90  | 0.10 | 0.77  | 0.17 | 0.09  |
| NKB025    | Px2  | 1.76 | 1.46   | 4.04   | 2.01  | 189.34 | -    | 0.71 | 20.71  | 3.04 | 0.18 | 0.29  | 0.19  | 0.01 | 0.13  | -    | 0.02  |
| NZB144    | Px2  | 1.55 | 1.09   | 3.99   | 4.48  | 133.67 | 0.95 | 0.07 | 3.72   | 1.00 | 0.03 | 0.11  | 0.03  | 0.01 | 0.03  | -    | -     |
| KUB214.8  | Ilv1 | 1.09 | 0.30   | 3.26   | 0.08  | 137.50 | 0.86 | 0.17 | 0.54   | -    | 0.38 | 4.56  | 1.47  | 0.37 | 1.14  | 0.15 | 0.46  |
| KUB214.9  | Ilv1 | 0.69 | 0.39   | 25.58  | 0.14  | 148.02 | -    | 0.00 | 0.43   | 0.05 | 0.21 | 2.64  | 0.90  | 0.15 | 0.41  | 0.09 | 0.88  |
| KUB214.10 | Ilv1 | 0.95 | 9.68   | 101.22 | 0.19  | 105.80 | 2.12 | 0.04 | 1.37   | -    | 0.44 | 3.83  | 3.63  | 1.05 | 6.16  | 1.35 | 8.70  |

|          |      |      |      |       |      |        |      |      |      |      |      |      |      |      |      |      |      |
|----------|------|------|------|-------|------|--------|------|------|------|------|------|------|------|------|------|------|------|
| KUB226.1 | Ilv1 | 0.79 | 9.63 | 20.18 | 0.27 | 109.04 | -    | 0.29 | 0.30 | 0.17 | -    | 2.54 | 3.90 | 1.43 | 8.68 | 2.53 | 7.98 |
| KUB226.2 | Ilv1 | 0.75 | 1.20 | 19.47 | 0.27 | 207.20 | 1.14 | -    | 0.67 | 0.09 | 0.08 | 3.14 | 3.22 | 0.68 | 2.83 | 0.22 | 0.66 |
| NZB004.1 | Ilv2 | 0.88 | 1.71 | 4.92  | 0.08 | 162.21 | 0.20 | 0.19 | 1.79 | 0.04 | 0.22 | 5.60 | 2.44 | 0.77 | 3.87 | 0.66 | 0.90 |
| NZB004.2 | Ilv2 | 1.09 | 0.59 | 7.09  | 0.05 | 167.04 | -    | 0.03 | 0.58 | 0.01 | -    | 3.21 | 1.01 | 0.31 | 1.87 | 0.47 | 0.53 |
| KUB239   | Ilv2 | 0.54 | 0.87 | 3.55  | 1.26 | 210.29 | 1.73 | 0.04 | 0.06 | 0.09 | 0.20 | 0.02 | 0.09 | 0.05 | 0.07 | 0.13 | 0.18 |
| NZB133   | Ilv3 | 0.90 | 7.06 | 5.33  | 1.35 | 193.07 | -    | -    | 0.23 | 0.06 | -    | 0.47 | 0.75 | 0.29 | 2.54 | 1.28 | 0.27 |
| NZB135   | Ilv3 | 1.59 | 2.34 | 6.82  | 1.83 | 205.17 | 1.23 | 0.00 | 0.23 | 0.05 | 0.33 | 0.03 | 0.07 | 0.05 | 0.39 | 0.26 | 0.24 |

Cont. Table S5

| Sample   | Type | Gd   | Tb   | Dy    | Ho   | Er   | Tm   | Yb   | Lu   | Y      | Hf   | Ta   | Zr    | Nb    | Pb   | Th    | U    |
|----------|------|------|------|-------|------|------|------|------|------|--------|------|------|-------|-------|------|-------|------|
| KUB213.1 | Grt1 | 0.06 | 0.01 | -     | -    | -    | -    | -    | -    | 0.01   | -    | 0.02 | 0.02  | -     | 0.00 | -     | 0.39 |
| KUB213.2 | Grt1 | 0.13 | -    | 0.08  | 0.01 | -    | -    | -    | -    | 0.04   | -    | 0.01 | 0.47  | 0.02  | -    | -     | 1.41 |
| KUB213.3 | Grt1 | 0.20 | -    | -     | -    | -    | -    | -    | 0.01 | -      | -    | 0.02 | 0.03  | -     | 0.04 | 0.05  | 0.89 |
| KUB213.4 | Grt1 | 0.06 | -    | -     | -    | -    | 0.01 | -    | -    | 0.04   | -    | 0.01 | 0.26  | -     | 0.10 | 0.02  | 1.08 |
| KUB213.5 | Grt1 | 0.41 | -    | -     | 0.02 | -    | -    | -    | -    | 0.06   | -    | 0.02 | -     | -     | 0.13 | -     | 1.35 |
| KUB214.1 | Grt1 | 6.69 | 1.01 | 10.23 | 3.24 | 9.15 | 0.92 | 5.97 | 0.81 | 118.97 | 0.56 | 3.53 | 27.92 | 24.61 | 9.28 | 5.81  | 9.99 |
| KUB214.2 | Grt1 | 3.52 | 0.56 | 5.25  | 1.19 | 3.08 | 0.48 | 3.10 | 0.21 | 40.90  | 0.42 | 0.04 | 8.41  | 0.05  | 3.19 | 4.61  | 4.73 |
| KUB214.3 | Grt1 | 0.85 | 0.06 | 0.34  | 0.04 | 0.16 | 0.07 | 0.68 | 0.22 | 3.02   | 0.31 | 0.07 | 15.94 | 0.42  | 0.48 | 8.15  | 2.42 |
| KUB214.4 | Grt1 | 1.83 | 0.25 | 2.49  | 0.68 | 2.31 | 0.40 | 2.38 | 0.28 | 23.46  | 0.88 | 0.28 | 27.53 | 4.06  | 0.55 | 3.07  | 1.15 |
| NKB67B.1 | Grt2 | 0.91 | 0.05 | 0.49  | 0.21 | 0.36 | 0.11 | 0.26 | 0.03 | 5.82   | 1.33 | 0.02 | 76.69 | 0.26  | 0.35 | 4.73  | 1.02 |
| NKB67B.2 | Grt2 | 1.72 | 0.30 | 1.74  | 0.35 | 1.28 | 0.19 | 1.21 | 0.34 | 11.96  | 1.62 | 0.48 | 68.56 | 3.09  | 2.20 | 12.83 | 2.08 |
| NKB67B.3 | Grt2 | 3.24 | 0.35 | 2.05  | 0.51 | 1.50 | 0.12 | 1.57 | 0.08 | 32.34  | -    | -    | 0.87  | 0.19  | 0.05 | -     | 0.08 |
| NKB67B.4 | Grt2 | 1.99 | 0.29 | 1.79  | 0.30 | 0.65 | 0.14 | 0.28 | 0.12 | 21.00  | -    | -    | -     | -     | 0.07 | -     | 0.11 |
| NZB272.1 | Px1  | 0.36 | 0.05 | 0.71  | 0.20 | 0.76 | 0.14 | 0.72 | 0.11 | 9.79   | 0.03 | -    | -     | 0.01  | 0.88 | 0.01  | 0.03 |
| NZB272.2 | Px1  | 0.35 | 0.03 | 0.32  | 0.11 | 0.31 | 0.03 | 0.16 | 0.01 | 4.81   | -    | -    | 0.23  | 0.05  | 1.56 | 0.05  | 0.20 |
| KUB241   | Px1  | 0.19 | 0.01 | 0.05  | 0.06 | 0.13 | 0.04 | 0.43 | 0.10 | 1.07   | 0.17 | 0.01 | 3.37  | 0.04  | 7.10 | 0.75  | 0.11 |

|          |      |      |      |      |      |      |      |      |      |       |      |      |      |      |       |      |      |
|----------|------|------|------|------|------|------|------|------|------|-------|------|------|------|------|-------|------|------|
| KUK002   | Px1  | -    | 0.00 | 0.09 | -    | -    | 0.01 | 0.33 | 0.06 | 0.33  | 0.19 | -    | 3.41 | 0.01 | 3.12  | 0.17 | 0.08 |
| NKB24    | Px2  | 0.48 | 0.04 | 0.49 | 0.05 | 0.31 | 0.02 | 0.62 | 0.33 | 2.66  | 0.37 | -    | 3.56 | 0.01 | 13.40 | 0.04 | 0.07 |
| KUB24    | Px2  | 0.32 | 0.03 | 0.22 | 0.10 | 0.11 | 0.02 | 0.54 | 0.20 | 1.72  | 0.20 | 0.02 | 3.48 | -    | 1.21  | 0.02 | 0.04 |
| NKB025   | Px2  | 0.08 | 0.01 | 0.09 | 0.02 | 0.09 | 0.05 | 0.17 | 0.04 | 1.67  | 0.04 | -    | 0.84 | 0.10 | 35.42 | 0.02 | 0.03 |
| NZB144   | Px2  | 0.09 | -    | 0.06 | 0.02 | 0.02 | 0.01 | 0.25 | 0.01 | 0.83  | 0.11 | -    | 0.46 | 0.01 | 17.35 | -    | -    |
| KUB214.1 | Ilv1 | 0.38 | 0.10 | 0.30 | 0.04 | 0.18 | 0.01 | 0.10 | 0.01 | 2.80  | -    | -    | 0.26 | 0.01 | 0.49  | -    | 0.04 |
| KUB214.2 | Ilv1 | 0.03 | 0.01 | 0.08 | 0.01 | 0.02 | -    | -    | 0.01 | 0.26  | -    | 0.01 | 0.09 | -    | 0.38  | 0.02 | 0.22 |
| KUB214.3 | Ilv1 | 2.47 | 0.44 | 3.01 | 0.66 | 1.81 | 0.15 | 0.77 | 0.07 | 38.55 | -    | -    | 0.05 | -    | 2.35  | 0.11 | 0.67 |
| KUB226.1 | Ilv1 | 4.66 | 0.85 | 5.22 | 1.11 | 3.15 | 0.29 | 1.69 | 0.25 | 58.49 | -    | -    | 0.39 | 0.03 | 1.55  | 0.14 | 1.06 |
| KUB226.2 | Ilv1 | 0.60 | 0.09 | 0.42 | 0.19 | 0.78 | 0.06 | 0.50 | 0.10 | 12.95 | 0.05 | -    | 2.17 | 0.02 | 43.24 | 0.16 | 0.08 |
| NZB004.1 | Ilv2 | 1.30 | 0.11 | 0.87 | 0.23 | 0.76 | 0.05 | 0.74 | 0.05 | 12.21 | -    | -    | 0.05 | 0.01 | 1.91  | 0.01 | 0.27 |
| NZB004.2 | Ilv2 | 0.97 | 0.08 | 1.06 | 0.20 | 0.42 | 0.07 | 0.38 | 0.02 | 11.51 | -    | -    | -    | 0.00 | 3.84  | 0.04 | 0.02 |
| KUB239   | Ilv2 | 0.16 | 0.01 | -    | -    | -    | -    | -    | -    | 0.10  | 0.09 | 0.03 | -    | 0.09 | 0.06  | -    | 0.02 |
| NZB133   | Ilv3 | 0.99 | 0.18 | 0.75 | 0.16 | 0.37 | 0.02 | 0.35 | 0.01 | 9.21  | 0.04 | 0.37 | 3.17 | 2.24 | 0.03  | 0.24 | 0.38 |
| NZB135   | Ilv3 | 0.56 | 0.19 | 1.01 | 0.45 | 1.93 | 0.14 | 1.69 | 0.42 | 20.97 | -    | 0.03 | 1.05 | 0.05 | 0.03  | 0.01 | 0.01 |

Notes: “-” in the table represents the results which is below the lower limit of instrument test
